# Supplementary material
Source: PubMed Central journal article supplement (PMC3189034)
Supplement: 1106893108_pnas.201106893SI.pdf [file 1106893108_pnas.201106893SI.pdf]

# Supporting Information

## Savage and Zamudio 10.1073/pnas.1106893108

### SI Methods

**Egg Mass Collection and Husbandry.** We collected *L. yavapaiensis* egg masses from five populations in Arizona in March 2008 (Fig. S1). We detached partial clutches and shipped them overnight to Cornell University. Frogs were housed in a 12 h/12 h light/dark regimen at 30% humidity ( $\pm 3\%$ ) and 21 °C ( $\pm 1$  °C) to mimic winter field conditions. Upon hatching, we equally divided larvae from each clutch into eight replicate 16 × 30 × 9 cm plastic cages filled with dechlorinated laboratory water. We fed larvae 90% spirulina algae and 10% fish flakes ad libitum, replacing water with fresh dechlorinated laboratory water three times per week. Variable survival resulted in unequal numbers of frogs per replicate, ranging from one to five per cage (Table S3). We transferred metamorphosed frogs to 16 × 30 × 9 cm plastic cages containing plastic perches and kept moist with a film of dechlorinated laboratory water. Frogs were fed 3-wk-old pathogen-free crickets ad libitum. Only metamorphs reaching the stage of complete tail resorption (i.e., past Gosner stage 46) were used in experimental infections.

**Bd and Chytridiomycosis Field Surveys.** We surveyed populations for *Bd* during winter (January and February) of 2007 through 2010 (1). We categorized each dead individual testing positive for *Bd* as a chytridiomycosis mortality event. Additionally, we collected frogs with signs of chytridiomycosis (i.e., skin redness, lethargy, and loss of righting ability) for overnight observation, and categorized these as *Bd* mortalities if death occurred within 24 h and the individuals were *Bd*-positive. We estimated *Bd* infection and mortality prevalence with 95% Clopper–Pearson binomial confidence intervals (2).

**Analysis of Risk Factors.** We calculated relative risk (RR) using Eq. (1):

$$RR = (p^+ \times c^-) / (p^- \times c^+), \quad [1]$$

where  $p^+$  is the frequency of frogs with allele  $x$  that died,  $p^-$  is the frequency of frogs with allele  $x$  that did not die,  $c^-$  is the frequency of frogs without allele  $x$  that died, and  $c^+$  is the frequency of frogs without allele  $x$  that did not die. Significance of each RR value was assessed by Fisher exact test and sequential Bonferroni correction (3).

1. Savage AE, Sredl MJ, Zamudio KR (2011) Disease dynamics vary spatially and temporally in a North American amphibian. *Biol Conserv* 144:1910–1915.
2. Clopper C, Pearson S (1934) The use of confidence or fiducial limits illustrated in the case of the binomial. *Biometrika* 26:404–413.

3. Kosakovsky Pond SL, Posada D, Gravenor MB, Woelk CH, Frost SDW (2006) Automated phylogenetic detection of recombination using a genetic algorithm. *Mol Biol Evol* 23: 1891–1901.

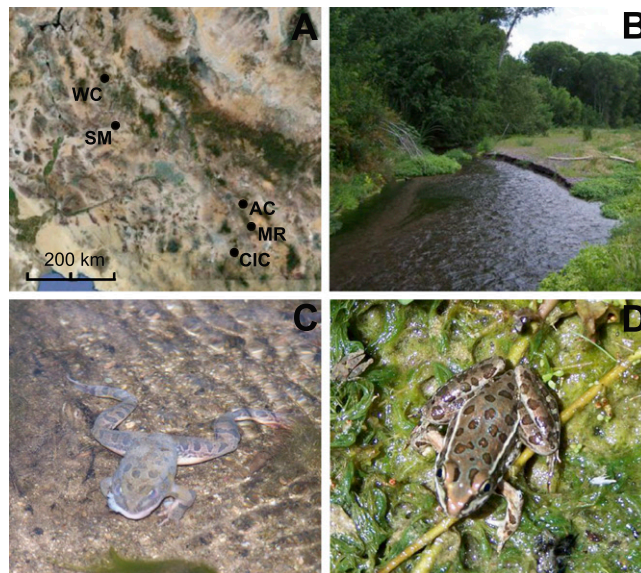

**Fig. S1.** (A) Egg mass collection localities in Arizona for the five *L. yavapaiensis* populations used in experimental *Bd* infections. (B) Photo of AC shows typical *L. yavapaiensis* habitat. (C) Image of a *Bd*-infected frog found dead with signs of chytridiomycosis at CIC. (D) Image of a healthy frog from CIC.

1 16 31 46 61 76 91 106 121 136 151 166 181 196 211 226 241

X. laevis I1B -----CAATGTCAGTTTTCGGACGGTAAATTAGTAATCAGGAGAGTTCGTCTACTTTCACAGTGTATGGTGTCTTATATCGCTAATAAAGATTTTGGAGAGTTCAGGGGATCATTTTGAACAGCCAGAGGAGATCCTTAGAGCAGAGACGGGCTGAGG-----

R. temp. I1B TTATAGGGTCAGTGTATTACCGGAACGGACGGAGAGTTCAGGCTTCTGAAAGCTTTCATGACATTCAGGAGAGTTCCTGCTTCTGACAGCGCATAGAGATTTCTATCCCTCCAGACCGATATGGGAGACCGGACGGACCGAT-----

Allele A GGTAGGCTCAGTGTATTACCGGAACGGACGGAGAGTTCAGGCTTCTGAAAGCTTTCATGACATTCAGGAGAGTTCCTGCTTCTGACAGCGCATAGAGATTTCTATCCCTCCAGACCGATATGGGAGACCGGACGGACCGAT-----

Allele B AGTAGGCTCAGTGTATTACCGGAACGGACGGAGAGTTCAGGCTTCTGAAAGCTTTCATGACATTCAGGAGAGTTCCTGCTTCTGACAGCGCATAGAGATTTCTATCCCTCCAGACCGATATGGGAGACCGGACGGACCGAT-----

Allele C GGTAGGCTCAGTGTATTACCGGAACGGACGGAGAGTTCAGGCTTCTGAAAGCTTTCATGACATTCAGGAGAGTTCCTGCTTCTGACAGCGCATAGAGATTTCTATCCCTCCAGACCGATATGGGAGACCGGACGGACCGAT-----

Allele D GGTAGGCTCAGTGTATTACCGGAACGGACGGAGAGTTCAGGCTTCTGAAAGCTTTCATGACATTCAGGAGAGTTCCTGCTTCTGACAGCGCATAGAGATTTCTATCCCTCCAGACCGATATGGGAGACCGGACGGACCGAT-----

Allele E GTTAGGCTCAGTGTATTACCGGAACGGACGGAGAGTTCAGGCTTCTGAAAGCTTTCATGACATTCAGGAGAGTTCCTGCTTCTGACAGCGCATAGAGATTTCTATCCCTCCAGACCGATATGGGAGACCGGACGGACCGAT-----

Allele F AGTAGGCTCAGTGTATTACCGGAACGGACGGAGAGTTCAGGCTTCTGAAAGCTTTCATGACATTCAGGAGAGTTCCTGCTTCTGACAGCGCATAGAGATTTCTATCCCTCCAGACCGATATGGGAGACCGGACGGACCGAT-----

Allele G GTTAGGCTCAGTGTATTACCGGAACGGACGGAGAGTTCAGGCTTCTGAAAGCTTTCATGACATTCAGGAGAGTTCCTGCTTCTGACAGCGCATAGAGATTTCTATCCCTCCAGACCGATATGGGAGACCGGACGGACCGAT-----

Allele H TTATAGGCTCAGTGTATTACCGGAACGGACGGAGAGTTCAGGCTTCTGAAAGCTTTCATGACATTCAGGAGAGTTCCTGCTTCTGACAGCGCATAGAGATTTCTATCCCTCCAGACCGATATGGGAGACCGGACGGACCGAT-----

Allele I GGTAGGCTCAGTGTATTACCGGAACGGACGGAGAGTTCAGGCTTCTGAAAGCTTTCATGACATTCAGGAGAGTTCCTGCTTCTGACAGCGCATAGAGATTTCTATCCCTCCAGACCGATATGGGAGACCGGACGGACCGAT-----

Allele J GGTAGGCTCAGTGTATTACCGGAACGGACGGAGAGTTCAGGCTTCTGAAAGCTTTCATGACATTCAGGAGAGTTCCTGCTTCTGACAGCGCATAGAGATTTCTATCCCTCCAGACCGATATGGGAGACCGGACGGACCGAT-----

Allele K GGTAGGCTCAGTGTATTACCGGAACGGACGGAGAGTTCAGGCTTCTGAAAGCTTTCATGACATTCAGGAGAGTTCCTGCTTCTGACAGCGCATAGAGATTTCTATCCCTCCAGACCGATATGGGAGACCGGACGGACCGAT-----

Allele L AGTAGGCTCAGTGTATTACCGGAACGGACGGAGAGTTCAGGCTTCTGAAAGCTTTCATGACATTCAGGAGAGTTCCTGCTTCTGACAGCGCATAGAGATTTCTATCCCTCCAGACCGATATGGGAGACCGGACGGACCGAT-----

Allele M AGTAGGCTCAGTGTATTACCGGAACGGACGGAGAGTTCAGGCTTCTGAAAGCTTTCATGACATTCAGGAGAGTTCCTGCTTCTGACAGCGCATAGAGATTTCTATCCCTCCAGACCGATATGGGAGACCGGACGGACCGAT-----

Allele N AGTAGGCTCAGTGTATTACCGGAACGGACGGAGAGTTCAGGCTTCTGAAAGCTTTCATGACATTCAGGAGAGTTCCTGCTTCTGACAGCGCATAGAGATTTCTATCCCTCCAGACCGATATGGGAGACCGGACGGACCGAT-----

Allele O ATTAGGCTCAGTGTATTACCGGAACGGACGGAGAGTTCAGGCTTCTGAAAGCTTTCATGACATTCAGGAGAGTTCCTGCTTCTGACAGCGCATAGAGATTTCTATCCCTCCAGACCGATATGGGAGACCGGACGGACCGAT-----

Allele P AGTAGGCTCAGTGTATTACCGGAACGGACGGAGAGTTCAGGCTTCTGAAAGCTTTCATGACATTCAGGAGAGTTCCTGCTTCTGACAGCGCATAGAGATTTCTATCCCTCCAGACCGATATGGGAGACCGGACGGACCGAT-----

Allele Q AGTAGGCTCAGTGTATTACCGGAACGGACGGAGAGTTCAGGCTTCTGAAAGCTTTCATGACATTCAGGAGAGTTCCTGCTTCTGACAGCGCATAGAGATTTCTATCCCTCCAGACCGATATGGGAGACCGGACGGACCGAT-----

Allele R GTTAGGCTCAGTGTATTACCGGAACGGACGGAGAGTTCAGGCTTCTGAAAGCTTTCATGACATTCAGGAGAGTTCCTGCTTCTGACAGCGCATAGAGATTTCTATCCCTCCAGACCGATATGGGAGACCGGACGGACCGAT-----

Allele S GGTAGGCTCAGTGTATTACCGGAACGGACGGAGAGTTCAGGCTTCTGAAAGCTTTCATGACATTCAGGAGAGTTCCTGCTTCTGACAGCGCATAGAGATTTCTATCCCTCCAGACCGATATGGGAGACCGGACGGACCGAT-----

Allele T AGTAGGCTCAGTGTATTACCGGAACGGACGGAGAGTTCAGGCTTCTGAAAGCTTTCATGACATTCAGGAGAGTTCCTGCTTCTGACAGCGCATAGAGATTTCTATCCCTCCAGACCGATATGGGAGACCGGACGGACCGAT-----

Allele U AGTAGGCTCAGTGTATTACCGGAACGGACGGAGAGTTCAGGCTTCTGAAAGCTTTCATGACATTCAGGAGAGTTCCTGCTTCTGACAGCGCATAGAGATTTCTATCCCTCCAGACCGATATGGGAGACCGGACGGACCGAT-----

Allele V GTTAGGCTCAGTGTATTACCGGAACGGACGGAGAGTTCAGGCTTCTGAAAGCTTTCATGACATTCAGGAGAGTTCCTGCTTCTGACAGCGCATAGAGATTTCTATCCCTCCAGACCGATATGGGAGACCGGACGGACCGAT-----

Allele W GGTAGGCTCAGTGTATTACCGGAACGGACGGAGAGTTCAGGCTTCTGAAAGCTTTCATGACATTCAGGAGAGTTCCTGCTTCTGACAGCGCATAGAGATTTCTATCCCTCCAGACCGATATGGGAGACCGGACGGACCGAT-----

Allele X AGTAGGCTCAGTGTATTACCGGAACGGACGGAGAGTTCAGGCTTCTGAAAGCTTTCATGACATTCAGGAGAGTTCCTGCTTCTGACAGCGCATAGAGATTTCTATCCCTCCAGACCGATATGGGAGACCGGACGGACCGAT-----

Allele Y GGTAGGCTCAGTGTATTACCGGAACGGACGGAGAGTTCAGGCTTCTGAAAGCTTTCATGACATTCAGGAGAGTTCCTGCTTCTGACAGCGCATAGAGATTTCTATCCCTCCAGACCGATATGGGAGACCGGACGGACCGAT-----

Allele Z GGTAGGCTCAGTGTATTACCGGAACGGACGGAGAGTTCAGGCTTCTGAAAGCTTTCATGACATTCAGGAGAGTTCCTGCTTCTGACAGCGCATAGAGATTTCTATCCCTCCAGACCGATATGGGAGACCGGACGGACCGAT-----

Allele AA GGTAGGCTCAGTGTATTACCGGAACGGACGGAGAGTTCAGGCTTCTGAAAGCTTTCATGACATTCAGGAGAGTTCCTGCTTCTGACAGCGCATAGAGATTTCTATCCCTCCAGACCGATATGGGAGACCGGACGGACCGAT-----

Allele BB GGTAGGCTCAGTGTATTACCGGAACGGACGGAGAGTTCAGGCTTCTGAAAGCTTTCATGACATTCAGGAGAGTTCCTGCTTCTGACAGCGCATAGAGATTTCTATCCCTCCAGACCGATATGGGAGACCGGACGGACCGAT-----

Allele CC GGTAGGCTCAGTGTATTACCGGAACGGACGGAGAGTTCAGGCTTCTGAAAGCTTTCATGACATTCAGGAGAGTTCCTGCTTCTGACAGCGCATAGAGATTTCTATCCCTCCAGACCGATATGGGAGACCGGACGGACCGAT-----

Allele DD AGTAGGCTCAGTGTATTACCGGAACGGACGGAGAGTTCAGGCTTCTGAAAGCTTTCATGACATTCAGGAGAGTTCCTGCTTCTGACAGCGCATAGAGATTTCTATCCCTCCAGACCGATATGGGAGACCGGACGGACCGAT-----

Allele EE AGTAGGCTCAGTGTATTACCGGAACGGACGGAGAGTTCAGGCTTCTGAAAGCTTTCATGACATTCAGGAGAGTTCCTGCTTCTGACAGCGCATAGAGATTTCTATCCCTCCAGACCGATATGGGAGACCGGACGGACCGAT-----

Allele FF AGTAGGCTCAGTGTATTACCGGAACGGACGGAGAGTTCAGGCTTCTGAAAGCTTTCATGACATTCAGGAGAGTTCCTGCTTCTGACAGCGCATAGAGATTTCTATCCCTCCAGACCGATATGGGAGACCGGACGGACCGAT-----

Allele GG AGTAGGCTCAGTGTATTACCGGAACGGACGGAGAGTTCAGGCTTCTGAAAGCTTTCATGACATTCAGGAGAGTTCCTGCTTCTGACAGCGCATAGAGATTTCTATCCCTCCAGACCGATATGGGAGACCGGACGGACCGAT-----

**Fig. S2.** Alignment of 33 MHC class IIB alleles recovered from 99 *Bd*-infected *L. yavapaiensis* individuals. Alleles were aligned to *Silurana (Xenopus) laevis* and *Lithobates (Rana) temporaria* partial MHC class IIB sequences from GenBank (accession nos. EF210752.1 and FJ876299.1, respectively).

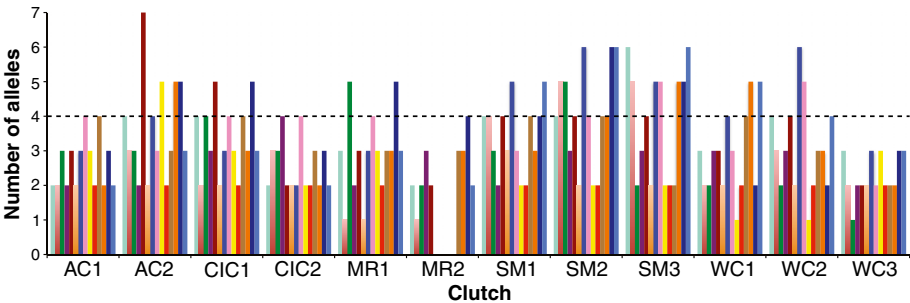

**Fig. S3.** Number of microsatellite alleles recovered for each *Bd*-infected *L. yavapaiensis* clutch. Colors represent each of the 14 genotyped microsatellite loci. The dotted line shows the threshold above which multiple paternity was inferred.



**Table S1. Cont.**

| Individual       | Pop | Replicate | Clutch | Survived, d | Survived? | No./ cage | 0 DPI mass, g | Death/ 35DPI mass, g | Change in mass | PBR heterozygosity | Max. inf. intensity | PBR Allele 1 | PBR Allele 2 |
|------------------|-----|-----------|--------|-------------|-----------|-----------|---------------|----------------------|----------------|--------------------|---------------------|--------------|--------------|
| WC 2.2.B1 TUF1-2 | WC  | 31        | 6      | 6           | No        | 2         | 1.2           | 1.02                 | -0.18          | Het                | 266.1               | O            | N            |
| WC 1.1.A1 TUF1-1 | WC  | 32        | 6      | 2           | No        | 1         | 1.28          | 1.01                 | -0.27          | Hom                | NA                  | F            | F            |
| WC 1.1.A2 TUF1-1 | WC  | 33        | 6      | 7           | No        | 4         | 1.5           | 1.03                 | -0.47          | Hom                | 526.4               | F            | F            |
| WC 1.1.A2 TUF1-2 | WC  | 33        | 6      | 6           | No        | 4         | 1.08          | 1.05                 | -0.03          | Het                | 526.4               | Z            | F            |
| WC 1.1.A2 TUF1-3 | WC  | 33        | 6      | 7           | No        | 4         | 1.04          | 1.12                 | 0.08           | Hom                | 526.4               | A            | A            |
| WC 1.1.A2 TUF1-4 | WC  | 33        | 6      | 5           | No        | 4         | 0.82          | 0.73                 | -0.09          | Hom                | 526.4               | A            | A            |
| WC 1.1.B2 TUF1-1 | WC  | 34        | 6      | 9           | No        | 1         | 1.07          | 0.51                 | -0.56          | Het                | 400.1               | A            | CC           |
| WC 3.1.B TUF1-1  | WC  | 35        | 7      | 5           | No        | 1         | 1.51          | 1.13                 | -0.38          | Hom                | NA                  | A            | A            |
| WC 3.1.C TUF1-1  | WC  | 36        | 7      | 4           | No        | 2         | 2.21          | 1.91                 | -0.3           | Hom                | NA                  | A            | A            |
| WC 3.1.C TUF1-2  | WC  | 36        | 7      | 5           | No        | 2         | 1.63          | 1.94                 | 0.31           | Hom                | NA                  | A            | A            |
| SM 1.1.A1 TUF1-1 | SM  | 37        | 8      | 7           | No        | 3         | 0.8           | 0.9                  | 0.1            | Hom                | 133.6               | A            | A            |
| SM 1.1.A1 TUF1-2 | SM  | 37        | 8      | 7           | No        | 3         | 0.81          | 0.96                 | 0.15           | Hom                | 133.6               | A            | A            |
| SM 1.1.A1 TUF1-3 | SM  | 37        | 8      | 2           | No        | 3         | 0.82          | 0.72                 | -0.1           | Hom                | 133.6               | L            | L            |
| SM 1.1.A2 TUF1-1 | SM  | 38        | 8      | 35          | Yes       | 1         | 1.18          | 1.49                 | 0.31           | Het                | 264.7               | A            | Q            |
| SM 1.1.B1 TUF1-1 | SM  | 39        | 8      | 7           | No        | 1         | 0.94          | 0.97                 | 0.03           | Hom                | 611.7               | A            | A            |
| SM 1.2.B1 TUF1-1 | SM  | 40        | 8      | 1           | No        | 2         | 1.2           | 1.2                  | 0              | Hom                | 332.30              | A            | A            |
| SM 1.2.B1 TUF1-2 | SM  | 41        | 8      | 17          | No        | 2         | 1.24          | 1.04                 | -0.2           | Hom                | 332.30              | A            | A            |
| SM 1.2.B2 TUF1-1 | SM  | 42        | 8      | 1           | No        | 2         | 1.27          | 1.33                 | 0.06           | Het                | 1302.09             | A            | U            |
| SM 1.2.B2 TUF1-2 | SM  | 42        | 8      | 22          | No        | 2         | 1.36          | 1.17                 | -0.19          | Hom                | 1302.09             | A            | A            |
| SM 1.2.A1 TUF1-1 | SM  | 43        | 9      | 10          | No        | 1         | 2             | 2.1                  | 0.1            | Hom                | 549.22              | A            | A            |
| SM 2.1.A1 TUF1-1 | SM  | 44        | 9      | 35          | Yes       | 1         | 1.41          | 0.93                 | -0.48          | Hom                | 125.6               | B            | B            |
| SM 2.1.A2 TUF1-1 | SM  | 45        | 9      | 10          | No        | 2         | 1.22          | 1.01                 | -0.21          | Hom                | 886.98              | B            | B            |
| SM 2.1.A2 TUF1-2 | SM  | 45        | 9      | 19          | No        | 2         | 1.28          | 1.31                 | 0.03           | Hom                | 886.98              | B            | B            |
| SM 2.1.B1 TUF1-1 | SM  | 46        | 9      | 6           | No        | 2         | 0.96          | 1.02                 | 0.06           | Hom                | 359.6               | B            | B            |
| SM 2.1.B1 TUF1-2 | SM  | 46        | 9      | 7           | No        | 2         | 1.42          | 0.58                 | -0.84          | Hom                | 359.6               | R            | R            |
| SM 2.1.B2 TUF1-1 | SM  | 47        | 9      | 7           | No        | 1         | 0.95          | 0.65                 | -0.3           | Het                | 371.3               | B            | E            |
| SM 2.2.B2 TUF1-1 | SM  | 48        | 9      | 9           | No        | 1         | 2.65          | 1.45                 | -1.2           | Het                | 422.3               | B            | DD           |
| SM 2.2.B1 TUF1-1 | SM  | 49        | 9      | 35          | Yes       | 1         | 0.96          | 0.92                 | -0.04          | Het                | 321.8               | B            | Q            |
| SM 2.3.B2 TUF1-1 | SM  | 50        | 8      | 35          | Yes       | 1         | 1.09          | 0.9                  | -0.19          | Het                | 593.6               | B            | N            |
| SM 3.1.A1 TUF1-1 | SM  | 51        | 10     | 35          | Yes       | 1         | 1.15          | 0.82                 | -0.33          | Het                | 408.4               | A            | B            |
| SM 3.1.A2 TUF1-1 | SM  | 52        | 10     | 35          | Yes       | 1         | 1.56          | 1.57                 | 0.01           | Het                | 523.2               | A            | T            |
| SM 3.1.B1 TUF1-1 | SM  | 53        | 10     | 35          | Yes       | 1         | 1.26          | 1.36                 | 0.1            | Het                | 149.4               | A            | Q            |
| SM 3.2.A1 TUF1-1 | SM  | 54        | 10     | 7           | No        | 1         | 0.74          | 0.82                 | 0.08           | Hom                | 288.4               | A            | A            |
| SM 3.2.B2 TUF1-1 | SM  | 55        | 10     | 5           | No        | 1         | 0.8           | 0.8                  | 0              | Hom                | NA                  | C            | C            |
| SM 3.2.B1 TUF1-1 | SM  | 56        | 10     | 17          | No        | 1         | 1.29          | 1.1                  | -0.19          | Hom                | 1411.24             | C            | C            |
| SM 3.2.A2 TUF1-1 | SM  | 57        | 10     | 14          | No        | 1         | 0.99          | 1.01                 | 0.02           | Het                | 754.32              | A            | V            |

Het, heterozygous; Hom, homozygous.

**Table S2. Terminal branch evolution among 33 PBR sequences from five *L. yavapaiensis* populations experimentally infected with *Bd***

| Terminal branch of ML phylogeny      | Codon site under positive selection | Normalized dN – dS | P value | Amino acid change |
|--------------------------------------|-------------------------------------|--------------------|---------|-------------------|
| Single likelihood ancestral counting |                                     |                    |         |                   |
| Leading to allele EE                 | 3                                   | 18.1               | 0.09    | Gly → His         |
| Fixed-effects likelihood             |                                     |                    |         |                   |
| Leading to allele EE                 | 3                                   | 1.1                | 0.03    | Gly → His         |
| Leading to allele EE                 | 18                                  | 0.93               | 0.03    | Ser → Lys         |
| Leading to allele Q                  | 46                                  | 0.74               | 0.04    | Leu → Val         |
| Random-effects likelihood            |                                     |                    |         |                   |
| Leading to allele EE                 | 3                                   | 3.21               | 0.99    | Gly → His         |
| Leading to allele EE                 | 18                                  | 3.32               | 0.99    | Ser → Lys         |

ML phylogeny of the 82-codon PBR alignment was used as the input tree for selection on particular codons within branches of the phylogeny. We used three different codon-based methods, all implemented with the HyPhy statistical software (1). The most conservative method, single likelihood ancestral counting, infers ancestral codon state and then calculates normalized expected and observed nonsynonymous (dN) and synonymous (dS) substitutions at each site (1). The fixed-effects likelihood method directly estimates rates of nonsynonymous and synonymous substitutions at each site, whereas the random-effects likelihood approach fits a distribution of substitution rates across sites and then infers the rate at which each site evolves (1). When the normalized difference between nonsynonymous and synonymous substitutions (dN – dS) equals 0, the site is neutrally evolving; when dN – dS > 0, the site is positively selected; and when dN – dS < 0, the site is negatively selected.

1. Pond SL, Frost SDW, Muse SV (2005) HyPhy: Hypothesis testing using phylogenies. *Bioinformatics* 21:676–679.

**Table S3. Survival from hatching through start of experimental infections for laboratory-reared *L. yavapaiensis***

| Clutch | Larvae hatched (%) | Larvae reaching Gosner stage 45 (%) | Frogs surviving metamorphosis (beyond Gosner stage 46) (%) |
|--------|--------------------|-------------------------------------|------------------------------------------------------------|
| CIC1   | 143 (100)          | 118 (83)                            | 32 (27)                                                    |
| CIC2   | 134 (100)          | 123 (92)                            | 24 (20)                                                    |
| AC1    | 188 (100)          | 91 (48)                             | 14 (15)                                                    |
| AC2    | 205 (100)          | 119 (58)                            | 14 (12)                                                    |
| MR1    | 195 (100)          | 11 (6)                              | 5 (57)                                                     |
| MR2    | 118 (100)          | 2 (2)                               | 2 (2)                                                      |
| MR3    | 0                  | —                                   | —                                                          |
| WC1    | 96 (20)            | 54 (56)                             | 7 (13)                                                     |
| WC2    | 255 (100)          | 167 (65)                            | 16 (10)                                                    |
| WC3    | 117 (100)          | 41 (35)                             | 5 (12)                                                     |
| SM1    | 247 (100)          | 159 (64)                            | 17 (11)                                                    |
| SM2    | 155 (100)          | 98 (63)                             | 13 (13)                                                    |
| SM3    | 253 (100)          | 115 (45)                            | 9 (8)                                                      |
| Total  | 1,810              | 1,044 (58)                          | 158 (15)                                                   |
| Mean   | 144 (85)           | 87.5 (55)                           | 13.2 (16)                                                  |
